# Supplementary material
Source: PubMed Central journal article supplement (PMC3864288)
Supplement: 1319754110_sapp.pdf [file 1319754110_sapp.pdf]

# Supplementary Information

## Mix-and-Match Evolution II

*M. Gregor Madej<sup>1</sup> and H. Ronald Kaback<sup>1,2,3\*</sup>*

*<sup>1</sup>Department of Physiology, <sup>2</sup>Department of Microbiology, Immunology & Molecular Genetics, <sup>3</sup>Molecular Biology Institute, David Geffen School of Medicine, University of California Los Angeles, Los Angeles, CA 90095*

**Running title:** Structure-Function Correlations in the MFS

**Keywords:** membrane transport | symport | MFS | sequence alignment |  
bioenergetics

\*Corresponding author: H. Ronald Kaback, rkaback@mednet.ucla.ed

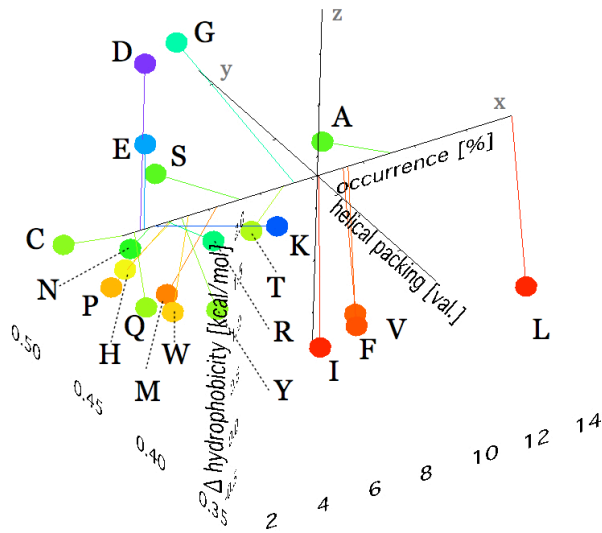

**Figure S1: Clustering of amino acid properties** (three-dimensional representation). The coordinates are computed from the relative occurrence [%] in alpha-helical membrane proteins for x-coordinate (1), the packing value [val.] for y-coordinate (1) and  $\Delta$  hydrophobicity [kcal/mol] for z-coordinate (2 and [http://blanco.biomol.uci.edu/hydrophobicity\\_scales.html](http://blanco.biomol.uci.edu/hydrophobicity_scales.html)). The amino acid identity is indicated by single letter code and the positions are colored according to  $\Delta$  hydrophobicity (from violet to red). Hydrophobic side chains I, F, V and L display similar helical packing and hydrophobicity properties paired with high abundance in in alpha-helical membrane proteins.

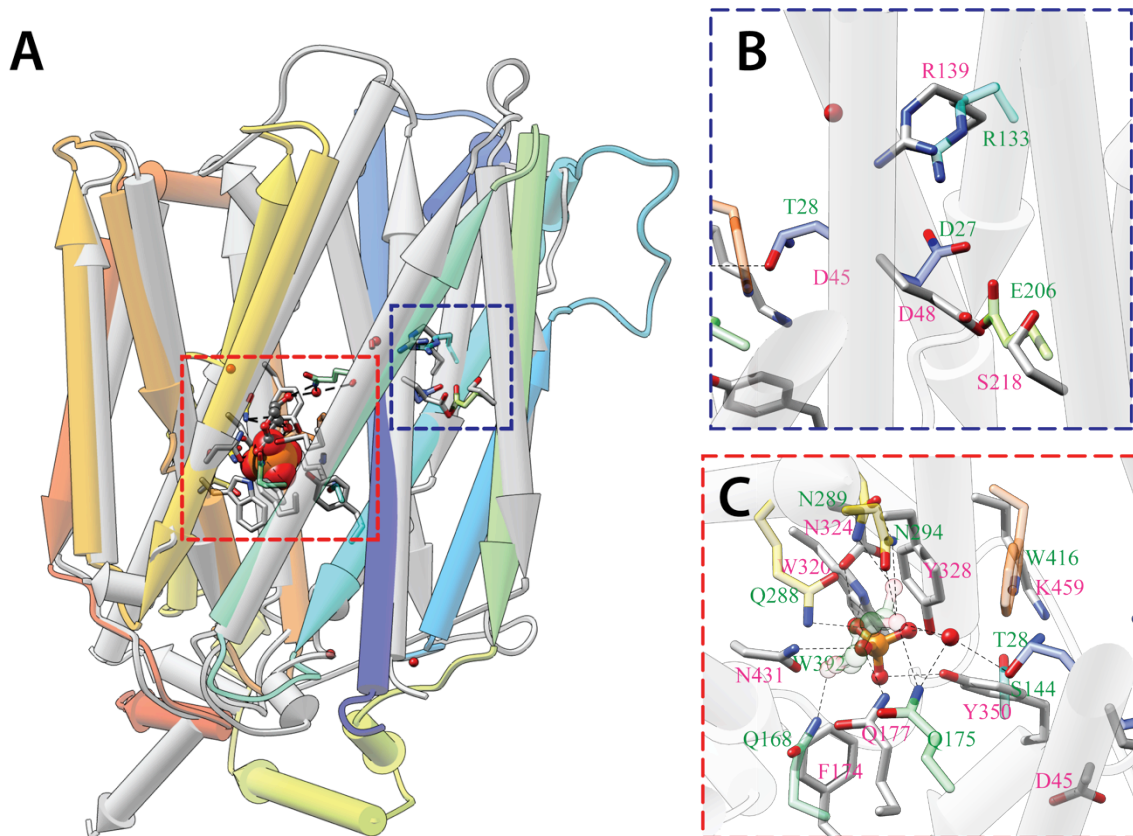

**Figure S2: Structure superposition of PiPT and XylE.** (A) Schematic representation of crystallographic structures of PiPT (PDBid 4J05; gray) and XylE (PDBid 4GBY; rainbow). A satisfying structure alignment is generated (rmsd achieved: 2.6 Å, number of residues reference (4GBY): 475, number of residues moving (4J05): 422, number of aligned residues: 346, sequence identity: 19.9%) where the putative H<sup>+</sup>-binding-sites (B, blue square) and the substrate binding-sites (C, red square) superpose. In the detailed representations residue labels of XylE are shown in green color and residue labels of PiPT are shown in magenta color. Xylose is shown a transparent shape for better visually.

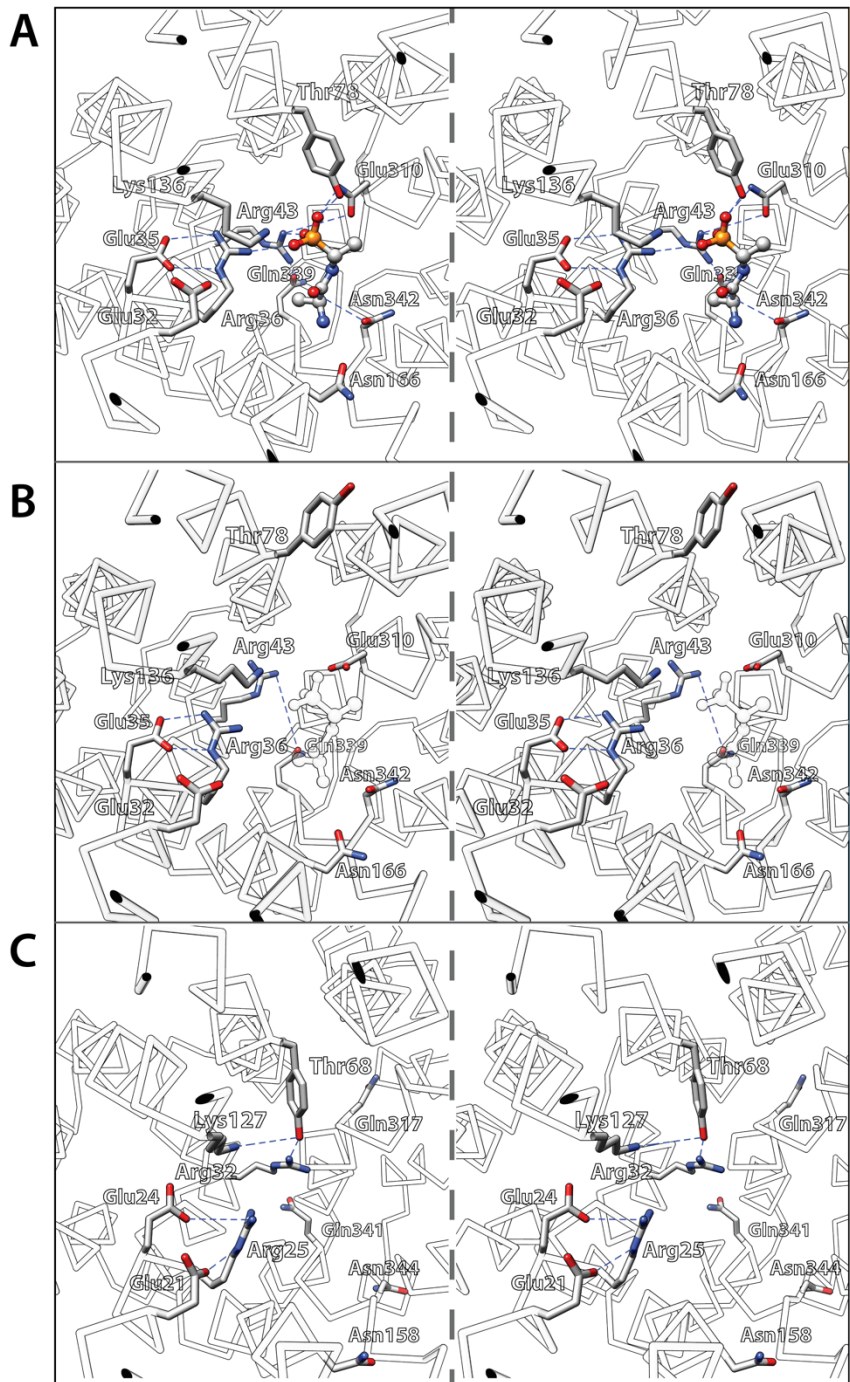

**Figure S3: Conformational changes in the substrate binding site of PepT.** (A) Inward-open, substrate-bound state of PepT<sub>Gk</sub> (pdbID: 4IKZ). (B) Inward-open, substrate-free state of PepT<sub>Gk</sub> (pdbID: 4IKV). The position of the substrate detected in the substrate-bound state is indicated as white profile. (C) Inward-occluded conformation of PepT<sub>so</sub> (pdbID: 2XUT). The colors of the bars on the right side indicate the mechanistic affiliation of the respective states with regard to the mechanistic model shown in Fig. 5.

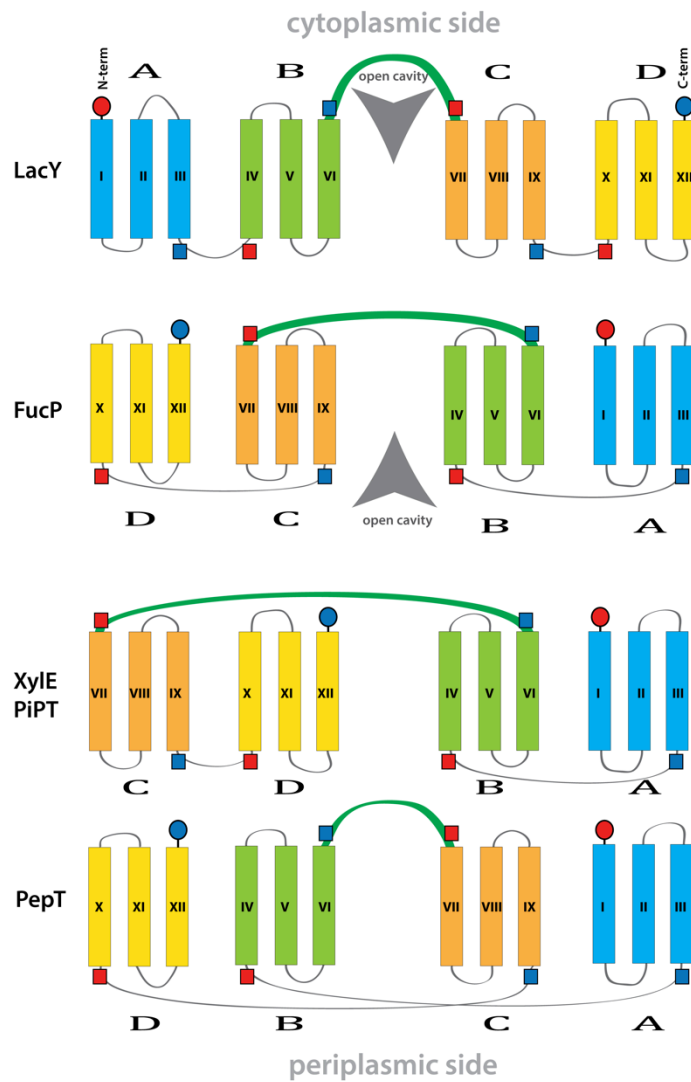

**Figure S4: Orientation of helix-triplets.** Helix-triplets from FucP , PiPT, XylE and PepT are aligned with LacY (helices 1–3, blue; helices 4–6, green; helices 7–9, orange; helices 10–12, yellow) according to Fig. 2, the order of the helices (roman numerals) is shown according to the alignment to LacY. The N- and the C-termini of the helix-triplets are indicated by red and blue rectangles respectively. A red dot marks the N-terminus of the protein and a blue dot marks the C-terminus. The central middle loop is shown as a green line. Although the orientation of homologous helix-triplets may be flipped relatively to LacY, The N-, the C-termini and the middle loop are always on the cytoplasmic side.

**Table S1: Reduction matrix for sequence simplification.** Grouping of residues based on reasonable simplification of protein sequence with no interlacing for different levels of reduction (modified from ref. 2). Letter grouped without spaces represent a reduction clade and are treated as similar in scoring of sequence alignments.

| level | score | reduction alphabet |     |        |         |      |      | symbol |      |   |    |   |   |   |   |   |   |   |   |   |   |   |
|-------|-------|--------------------|-----|--------|---------|------|------|--------|------|---|----|---|---|---|---|---|---|---|---|---|---|---|
| 0.    | 20    | L                  | I   | V      | F       | Y    | W    | M      | G    | P | A  | T | S | C | N | Q | E | D | H | R | K | * |
| 1.    | 10    | LIV                | F   | YW     | M       | GP   | ATS  | C      | NQED | H | RK |   |   |   |   |   |   |   |   |   | ! |   |
| 2.    | 7     | LIVF               | YW  | M      | GP      | ATSC | NQED | HRK    |      |   |    |   |   |   |   |   |   |   |   | : |   |   |
| 3.    | 4     | LIVF               | YWM | GPATSC | NQEDHRK |      |      |        |      |   |    |   |   |   |   |   |   |   |   | . |   |   |

**Equation S1: Similarity score.**

$$Q = \frac{\sum redValue}{(AA_{all} - AA_{LIVF}) \cdot 20}$$

$Q$ : similarity score,  $redValue$ : score assigned from the reduction matrix (SI Appendix, Table S1),  $AA_{all}$ : number of all residues in the alignment,  $AA_{LIVF}$ : number of not compared side-chains. For 100% conservation,  $Q$  should equal 1.

**Equation S2: Functional similarity score.**

$$Q_{Act} = \left( \frac{sAA_{0-25\%} \cdot 5}{AA_{0-25\%}} + \frac{sAA_{25-50\%}}{AA_{25-50\%}} \right) \div 6$$

$Q_{Act}$ : functional similarity score,  $sAA_{0-25\%}$ : number of aligned critical positions in the alignment,  $AA_{0-25\%}$ : number of all critical positions in the alignment,  $sAA_{25-50\%}$ : number of aligned functionally relevant positions in the alignment,  $AA_{25-50\%}$ : number of all functionally relevant positions in the alignment. Critical positions are positions where mutations to Cys cause greater than 50% and functionally relevant positions are positions where mutations to Cys cause 75% inhibition of the transport rate with Cys-less LacY (3, 4). For 100% conserved transporters with 100% conserved functional positions this value,  $Q_{Act}$ , should equal 1.

# Sequence Alignments

## LacY / PiPT

```

      ^   ^   ^       $   #   # $
      =   -
LacY-A.pdb,_chain_B/1-97   NTNFWMFGLFFFFYFFIMGAYFPFF...PIWLHDINHIS..... 36
PiPT-c.pdb,_chain_A/306-410 TWNHFRNLLGSMGLWFLVDIAFYGINLNQSVVLAQIGFAGKTGDVYDKLF 50
      *                               .   !   .

      ^   ^   # $   $ #   ^   ^
      -   =
LacY-A.pdb,_chain_B/1-97   .KSDTGIIFAAISLFSLLFQPLFGLLSDKLGLRKYLLWIITGMLVMFAPF 85
PiPT-c.pdb,_chain_A/306-410 QLATGNIIVTALGFLPGYYFTLF..LIDIVG.....RKKLQFMGFIMSGL 93
      ! .   ! * . .   .   * *   *   ! .

      $
      -
LacY-A.pdb,_chain_B/1-97   FIFIFGPLLQYN 97
PiPT-c.pdb,_chain_A/306-410 FLAILAGEIDHI 105
      !! !

      $^ $ # $# # # ## $$ $ #^## # $
      - = = = = - = = =
LacY-B.pdb,_chain_B/1-83   LVGSIVGGI.YLGFCFNAGAPAVEAFI..EKVSRRSNFEFGRARM..FGCV 46
PiPT-D.pdb,_chain_A/411-499 GKGPLLACFTFMQFFNFGANTTTFIVAELFPTRIRAS.AHGISAAAGKC 50
      * .   * ** .   * . * . . ! * .

## # # # # ^ ^
= =
LacY-B.pdb,_chain_B/1-83   GWALCASIVGIMFTI.NNQFVFWLGGSCALILAVLLF.F 83
PiPT-D.pdb,_chain_A/411-499 GAILSSLVFNQLKAKIGTSAVLWIFFSTCILGFISTFLI 89
      * :! * .

      #^ $ $# # ^$ ^ ^ $ $
      =
LacY-C.pdb,_chain_B/1-104   LFRQPKL.WFLSLYVIGVSCT.YDVFDQQFANFFTSFFATGEQGTRVFGYVT 50
PiPT-B.pdb,_chain_A/126-229 WDGNRVLTWITICRVFLGIGGDYPMSATVVSDR.ANI.HRRGTLLCFIFA 50
      ! * . * . . ** !

      $# $ # $ ## $^ # # $
      - = = - = -
LacY-C.pdb,_chain_B/1-104   TMGE.LLNASIMFFAPLIINRIGGKN.ALLLAGTIMSVRIIGSSSFATSALEV 100
PiPT-B.pdb,_chain_A/126-229 NQGWSFVGS�VTIVTISGFKH..RLKSGTHDVKAWRILIGLSLIPAFGT 100
      * .   .   ! ! ! ! ** . *

```

LacY-C.pdb,\_chain\_B/1-104  
PiPT-B.pdb,\_chain\_A/126-229

VILK 104  
LYQR 104  
!

LacY-D.pdb,\_chain\_B/1-89  
PiPT-A.pdb,\_chain\_A/30-116

# # ^# \$^ \$ ^# \$# # ^ #  
= = = = =  
SALEVILKTLHMFVFPFLLVGCFKYITSQFEVRFSATIY.LVCFCFKQ 49  
LVLLAGVGFLLDAYDL.FII...NQVAPMLAQVYFPKTGLPAQRQDLMKA 46  
. ! . . . ! . \*

LacY-D.pdb,\_chain\_B/1-89  
PiPT-A.pdb,\_chain\_A/30-116

\$ ^ ^  
-  
LAMIFMSVLAGNMYESIG.....FQGAYLVLGLVALGFTLISVFT 89  
AANI.GCVVGQVMFVGLGDSFGRKFVYGKELILIIIVATIFQM.... 87  
\* . . \* \*

### LacY / XylE

LacY-A.pdb,\_chain\_B/1-96  
XylE-C.pdb,\_chain\_A/276-365

^ ^ ^ \$ # # \$ ^  
= =  
TNFWMFGLFFFFYFFIMGAYFPFF.PIWLHDINHISKSDTGII.FA AISLFS 50  
GVIVIGVMLSIFQQFVGINVVLYAPEVFKTLG.AS.TDIALLQTIIVGVIN 50  
. \* : \* !\* .

LacY-A.pdb,\_chain\_B/1-96  
XylE-C.pdb,\_chain\_A/276-365

^ # \$ \$ # ^ ^ \$  
=  
LLFQPLFGLLSDKLGLRKYLLWIITGMLVMFAPFFIFIFGPLLQYN 96  
LFTFTVLAIMTVDKFG.RKPL.QII.GALGMAIGMFSLGTAFYT... 90  
\*\* \* \*\* \* \* !

LacY-B.pdb,\_chain\_B/1-88  
XylE-D.pdb,\_chain\_A/369-465

\$^ \$ # \$ # # ## \$\$ \$ #^## # \$ #  
= = = = - = =  
ILVGSIVGGIYLGFCF.NAGAPAVEAFIEKVSRRSNFEFGRARMFGCV.G 48  
GIVALLSMLFYVAAFAMSWG.PVCWVLLSEIF..PNAIRGKALAIIVAAQ 47  
. \* . \* \* . \* !\* .

LacY-B.pdb,\_chain\_B/1-88  
XylE-D.pdb,\_chain\_A/369-465

# # # # ^^  
= = =  
WALGASIVGIMFTIN.....NQVFWL.GSGCALILAVLLFFAKTD 88  
WL.ANYFVSWTFPMMDKNSWLVAHFHNGFSYWIYGCIMGVLAALFMWKFV.PE 97  
\* . . . \* \* \* .!



```

          #^ $   $# # ^$ ^ ^       $ $   $
          =   -   -   -   -   -   -
LacY-C.pdb,_chain_B/1-91      KLWFLSLYVIGVSDYDFDQQFANFFTSFFAT.GEQGTRVFGYVTTMG 48
XylE-B-coot-0.pdb,_chain_A/125-221 YVPEFVIYRIIGGIGVGLASMLSPMYIAELAPAHIRGKLVSNQFAIIFG 50
          *   .   .   .   !   !   .   *

```

```

          # $       # $       ## $^ # # $
          =   =   -   =   =
LacY-C.pdb,_chain_B/1-91      ELLNASIMFFAPLIINRI...GGKNALLAGTIMSVRIIGSSFATS 91
XylE-B-coot-0.pdb,_chain_A/125-221 QLLVYCVNYFIARSGDASWLNTDGWRYM.FASECIPALLFLMLLYTVP 97
          !   .   !   *   !   !   !   !   .

```

```

          # # ^# $^ $ ^#       $# #
          = - - - =
LacY-D.pdb,_chain_B/1-101     GSSFATSALVILKTLHM.FEVPFLLVG.C.FKYIT.SQFEVRFSATIY 46
XylE-A-coot-0.pdb,_chain_A/5-110 NSSYIFSITLVATLGLLFGYDTAVISGTVESLNTVFVAPQNLSAANS 50
          ** *   .   !   .   .   !   !   **!

```

```

          ^ #           $ ^
          -
LacY-D.pdb,_chain_B/1-101     LVCFCFF.KQLAMIFMSVLAGNMYESIGFQGAYLVGLVALGFTLISVFT 95
XylE-A-coot-0.pdb,_chain_A/5-110 LLGFCVASALIGCIIGGALGGYCSNRFGRDLSLIAAVLFFISGVGSAPW 100
          *   .   .   *   !   *   !   .   *   .

```

```

          ^
LacY-D.pdb,_chain_B/1-101     LSGPGP 101
XylE-A-coot-0.pdb,_chain_A/5-110 ELGFTS 106
          * ..

```

## LacY / PepT

```

          ^ ^ ^       $ #   #$           ^
          =
LacY-A.pdb,_chain_B/1-96      TNFWMFGLFFFFYFFIMGAYFPFFPIWLHDINHS.KSDTGIIFAAISLF 49
PepT_4IKZ_D.pdb,_chain_A/1-101 GGLVHPIWLVLSYFIVVLGELCLSPVGLSATTKLAPAAFSQTMWFLS 50
          *   .   *   .   !   !   !   !

```

```

          ^ # $   $ #       ^ ^       $
          = - =
LacY-A.pdb,_chain_B/1-96      SLLFQPLFGLLS.D.KLGLRKYLLWIITGMLVMFAPFFIFIFGPLLQ..Y 95
PepT_4IKZ_D.pdb,_chain_A/1-101 NAAAQAINAQLVRFYTPENETAYFGTIGGAALVGLILLAIAPRIGRLMK 100
          *   .   .   !   !   *   !   .   *

```

```

LacY-A.pdb,_chain_B/1-96      N 96
PepT_4IKZ_D.pdb,_chain_A/1-101 G 101

```

LacY-B.pdb,\_chain\_B/1-83  
PepT\_4IKZ\_B.pdb,\_chain\_A/1-100

\$^ \$ # \$# # # ## \$\$ \$ #  
LVGSIVGGIYLG...FCFNAGAPAVEAFIEKVSRRS...N.FE..... 36  
MAGHIALAIPGGVAALFVSMALIVLGTGLLKNVSSIVGDMYKPGDDRRD 50  
\* . \* . ! \* \* ! .

LacY-B.pdb,\_chain\_B/1-83  
PepT\_4IKZ\_B.pdb,\_chain\_A/1-100

^## \$# ## # # # ^  
..FGRARMFGCVGALGASIVGIMFTINNQFVFWLGSICALILAVLLF.. 82  
AGFSIFVMGINLGAFLAPLVVGTAGMKYNFHLGFGLAAVGMFLGLVVFVA 100  
. \* . \* . \* . \* . . . .

LacY-C.pdb,\_chain\_B/1-88  
PepT\_4IKZ\_C.pdb,\_chain\_A/1-102

#^ \$ \$# # ^\$ ^ ^ \$ \$ \$#  
LWFLSLYVIGVCTYDVFDDQGFANFFTSF.FATGEQTRVFGYVTTMGEL 49  
RVIAYIPLFVASAMFWAIQQGGSTILANYADKRTQLDVAGIHLSPAWFQS 50  
\* !\*\* . ! ! ! ! !

LacY-C.pdb,\_chain\_B/1-88  
PepT\_4IKZ\_C.pdb,\_chain\_A/1-102

\$ # \$ # \$ # \$ ^ # # \$  
LNASIMFF.APLIINRIG.....G.KNA..LLLAGTMSVRIIGSS 86  
LNPLFIIILAPVFAWMWVKLGKRQPTIPQKFALGLLFFAGLSFIVILVPGH 100  
\* . \*\* ! \* \* \*\* ! .

LacY-C.pdb,\_chain\_B/1-88  
PepT\_4IKZ\_C.pdb,\_chain\_A/1-102

FA 88  
LS 102  
!

LacY-D.pdb,\_chain\_B/1-89  
PepT\_4IKZ\_A.pdb,\_chain\_A/1-99

# # ^# \$^ \$ ^# \$# #  
SALEVILKTLHMFVFPFLLVGCFKYITSQ.....FEVRFSATIY 40  
HPKGLFTLFFTEFWERFSYY.GM.RAILVYYMYEVSKGGLGLDEHLALAIM 50  
. . \* \* ! ! : ! !

LacY-D.pdb,\_chain\_B/1-89  
PepT\_4IKZ\_A.pdb,\_chain\_A/1-99

^ # \$ ^  
LVCFCKQLAMIFMSVLAGNMYESIGFQAYLVLGLVALGFTLISVFT 89  
SIYGALVYMSGIIGWLADRVTGTSRAVFGYGLLIMAGHIALAIPGGVA 99  
. \* . . ! . !

## REFERENCES

1. Li T, Fan K, Wang J, & Wang W (2003) Reduction of protein sequence complexity by residue grouping. *Protein Eng* 16(5):323-330.
2. Eilers M, Shekar SC, Shieh T, Smith SO, & Fleming PJ (2000) Internal packing of helical membrane proteins. *Proc Natl Acad Sci U S A* 97(11):5796-5801.
3. Frillingos S, Sahin-Toth M, Wu J, & Kaback HR (1998) Cys-scanning mutagenesis: a novel approach to structure function relationships in polytopic membrane proteins. *Faseb J* 12(13):1281-1299.
4. Madej MG, Dang S, Yan N, & Kaback HR (2013) Evolutionary mix-and-match with MFS transporters. *Proc Natl Acad Sci U S A* 110(15):5870-5874.
